# Supplementary material for: An investigation into atmospheric nitrous acid (HONO) processes in South Korea
Source: Copernicus journal article supplement (doi:10.5194/egusphere-2024-886), 2024-04-16
Supplement: Supplementary file 1 [file egusphere-2024-886-supplement.pdf]

1 *Supplementary information for*

2 **An investigation into atmospheric nitrous acid (HONO)**

3 **processes in South Korea**

4

5 **Kiyeon Kim<sup>1</sup>, Kyung M. Han<sup>1\*</sup>, Chul H. Song<sup>1\*</sup>, Hyojun Lee<sup>1</sup>, Ross Beardsley<sup>2</sup>, Jinhyeok**  
6 **Yu<sup>1</sup>, Greg Yarwood<sup>2</sup>, Bonyoung Koo<sup>3</sup>, Jasper Madalipay<sup>1</sup>, Jung-Hun Woo<sup>4</sup>, and Seogju**  
7 **Cho<sup>5</sup>**

8

9 1. School of Earth Sciences and Environmental Engineering, Gwangju Institute of Science and  
10 Technology (GIST), Gwangju 61005, Republic of Korea

11 2. Ramboll USA, Novato, CA 94945, USA

12 3. Bay Area Air Quality Management District, San Francisco, CA 94105, USA

13 4. Department of Technology Fusion Engineering, College of Engineering, Konkuk University,  
14 Seoul 05029, Republic of Korea

15 5. Seoul Metropolitan Government Research Institute of Public Health Environment, 30,  
16 Janggunmaeul 3-gil, Gwacheon-si, Gyeonggi-do 13818, Republic of Korea

17

18

19 \* **Corresponding authors:** Kyung Man Han (kmhan@gist.ac.kr) and Chul Han Song

20 (chsong@gist.ac.kr)

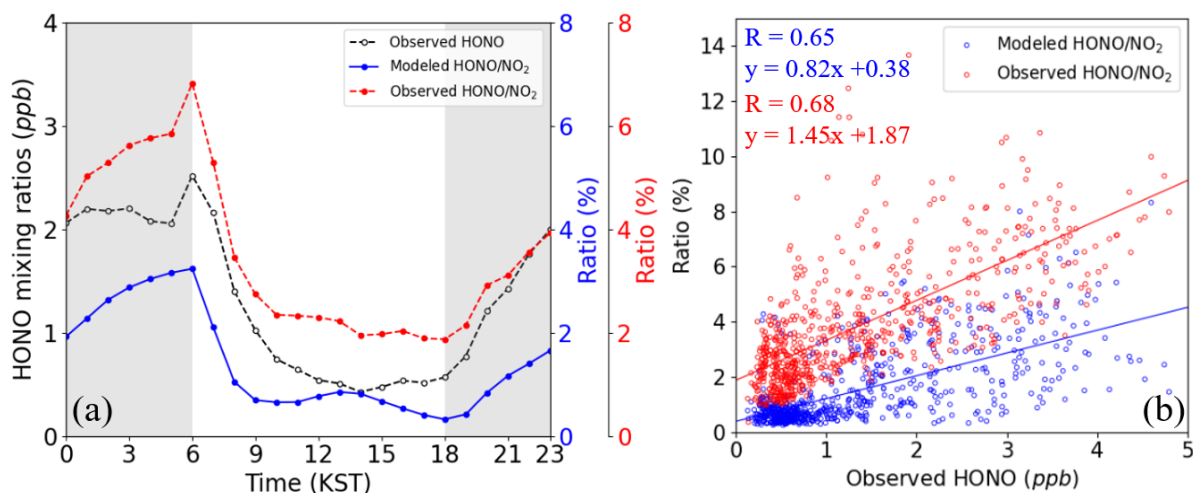

21

22 **Fig. S1.** (a) Diurnal variations of observed HONO (black open circles, left y-axis), modeled  
 23 HONO to NO<sub>2</sub> ratio (blue line, right y-axis), and observed HONO to NO<sub>2</sub> ratio (red line, right  
 24 y-axis) and (b) their scatter-plots between the observed HONO and the modeled ratio of HONO  
 25 to NO<sub>2</sub> (blue circles), and observed HONO to NO<sub>2</sub> (red circles) at the Olympic Park station  
 26 during the period of the KORUS-AQ campaign.

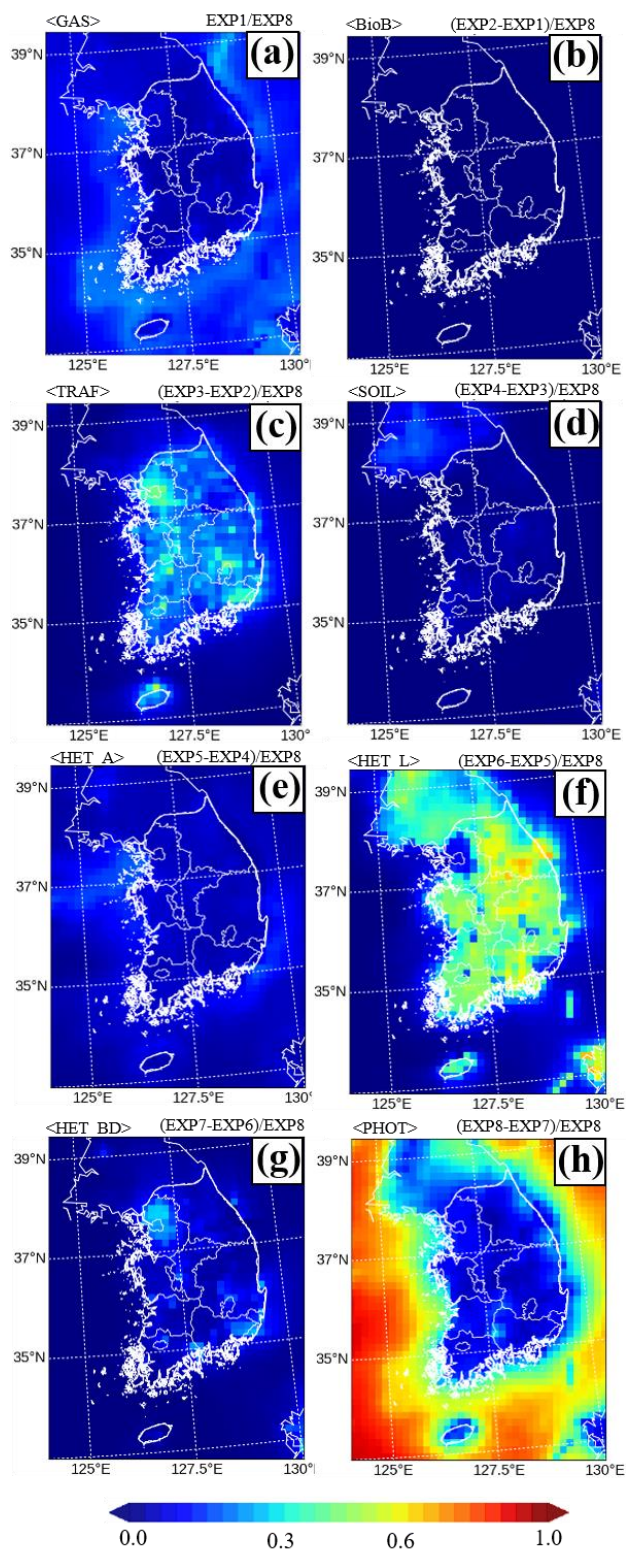

27

28 **Fig. S2.** Incremental ratio of (a) gas phase reactions; (b) biomass burning emissions; (c) traffic  
 29 emissions and (d) soil emissions; (e) heterogeneous reactions on the aerosol surfaces, (f)  
 30 heterogeneous reactions on the leaf surfaces, and (g) heterogeneous reactions on the building  
 31 surfaces; and (h) renoxification on HONO mixing ratios (unit: dimensionless).

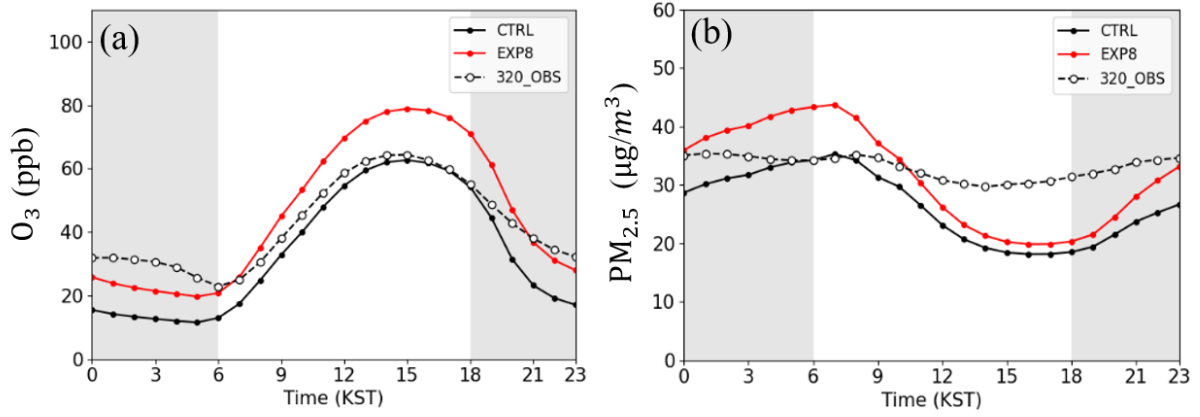

32

33 **Fig. S4.** Comparison of diurnal variations of the mixing ratios of (a) O<sub>3</sub>, and (b) PM<sub>2.5</sub>. Both  
 34 are averaged for 320 AIR KOREA monitoring stations during the period of the KORUS-AQ  
 35 campaign. The black open circles, black lines, and red lines represent observed values and  
 36 values from the CTRL and EXP8 simulations, respectively.

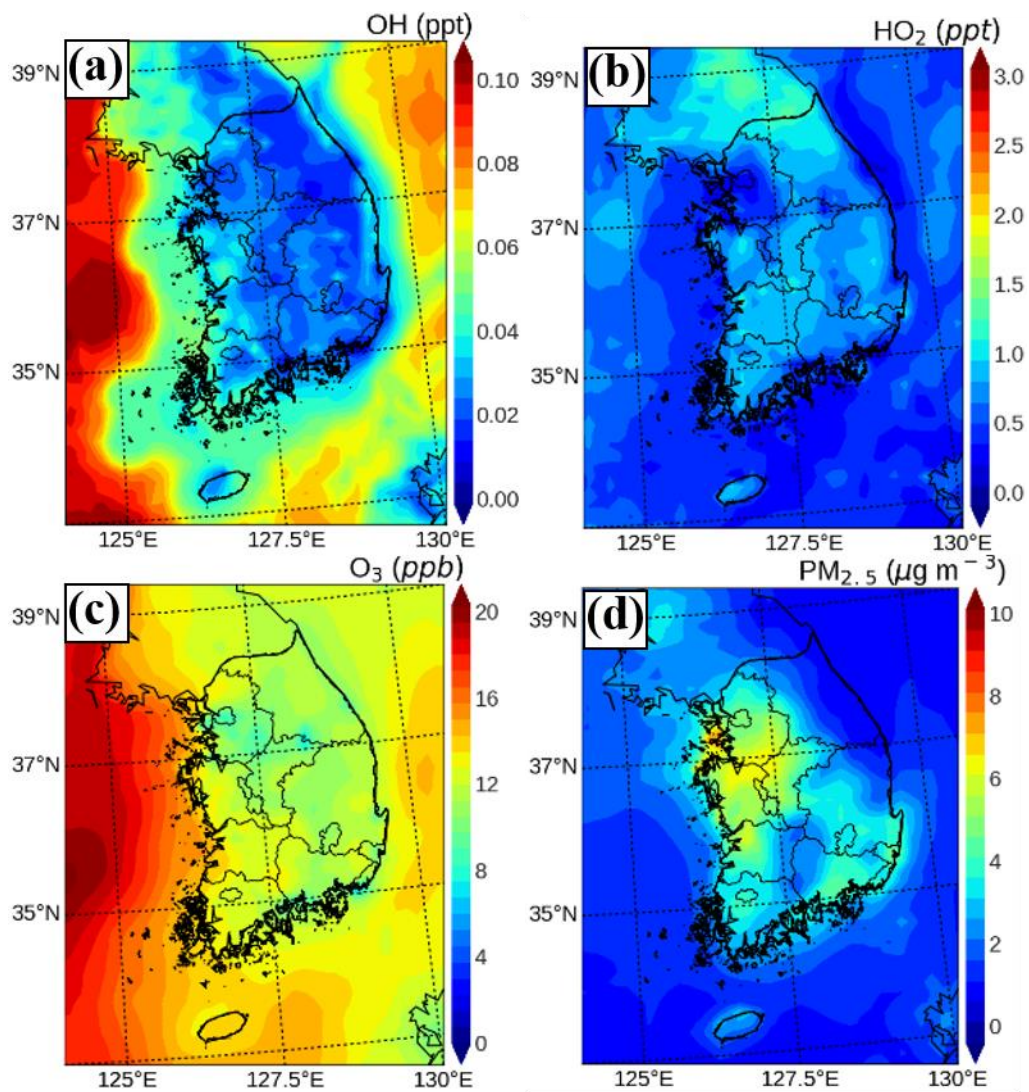

37

38 **Fig. S5.** Spatial distributions of the differences levels of (a) HONO, (b) OH, (c) HO<sub>2</sub>, and (d)  
 39 PM<sub>2.5</sub> between the EXP8 and CTRL simulations in South Korea during the period of the  
 40 KORUS-AQ campaign.

41 **Table S1.** Detection limits and uncertainties of instruments for observed HONO, NO<sub>2</sub>, O<sub>3</sub>, and  
 42 PM<sub>2.5</sub> at Olympic Park station, Korea.

| <b>Species</b>    | <b>Instruments</b>                                                    | <b>Detection limit</b> | <b>Uncertainty</b> | <b>Time resolution</b> |
|-------------------|-----------------------------------------------------------------------|------------------------|--------------------|------------------------|
| HONO              | Monitor for Aerosols and Gases in Ambient Air (MARGA, model ADI 2080) | 0.02ppbv               | ±20%               | 1 hour                 |
| NO <sub>2</sub>   | Ecotech gas sensor, EC8941                                            | 0.5ppbv                | ±10%               | 1 hour                 |
| O <sub>3</sub>    | Ecotech gas sensor, EC9810                                            | 0.5ppbv                | ±5%                | 1 hour                 |
| PM <sub>2.5</sub> | Thermo Fisher Scientific, FH62C14                                     | 4µg/m <sup>3</sup>     | ±10%               | 1 hour                 |

43

44 **Table S2.** Statistical analysis of modeled and observed meteorological parameters at the  
 45 Olympic Park station during the period of the KORUS-AQ campaign.

| Parameter               | Observed mean | Modeled mean | R    | RMSE  | MB    | IOA  |
|-------------------------|---------------|--------------|------|-------|-------|------|
| RH (%)                  | 55.50         | 55.60        | 0.87 | 11.06 | 0.09  | 0.93 |
| T (°C )                 | 22.38         | 21.10        | 0.94 | 1.84  | -1.28 | 0.94 |
| Pressure (hPa)          | 1000.35       | 999.75       | 0.97 | 1.14  | -0.60 | 0.98 |
| WS (m s <sup>-1</sup> ) | 2.08          | 2.46         | 0.45 | 1.17  | 0.39  | 0.65 |
| WD (°)                  | 205.40        | 202.18       | 0.53 | 83.49 | -3.24 | 0.74 |

46
